# Supplementary material
Source: Springer Nature journal article supplement (https://www.springermedizin.de/resource/supplementary/13046_2008_105_MOESM4_ESM.pdf/9661636)

**Figure 2a: Interferon- $\gamma$  secreting T-lymphocytes in PBMC**

IFN- $\gamma$  secreting T-lymphocytes in PBMC (%)

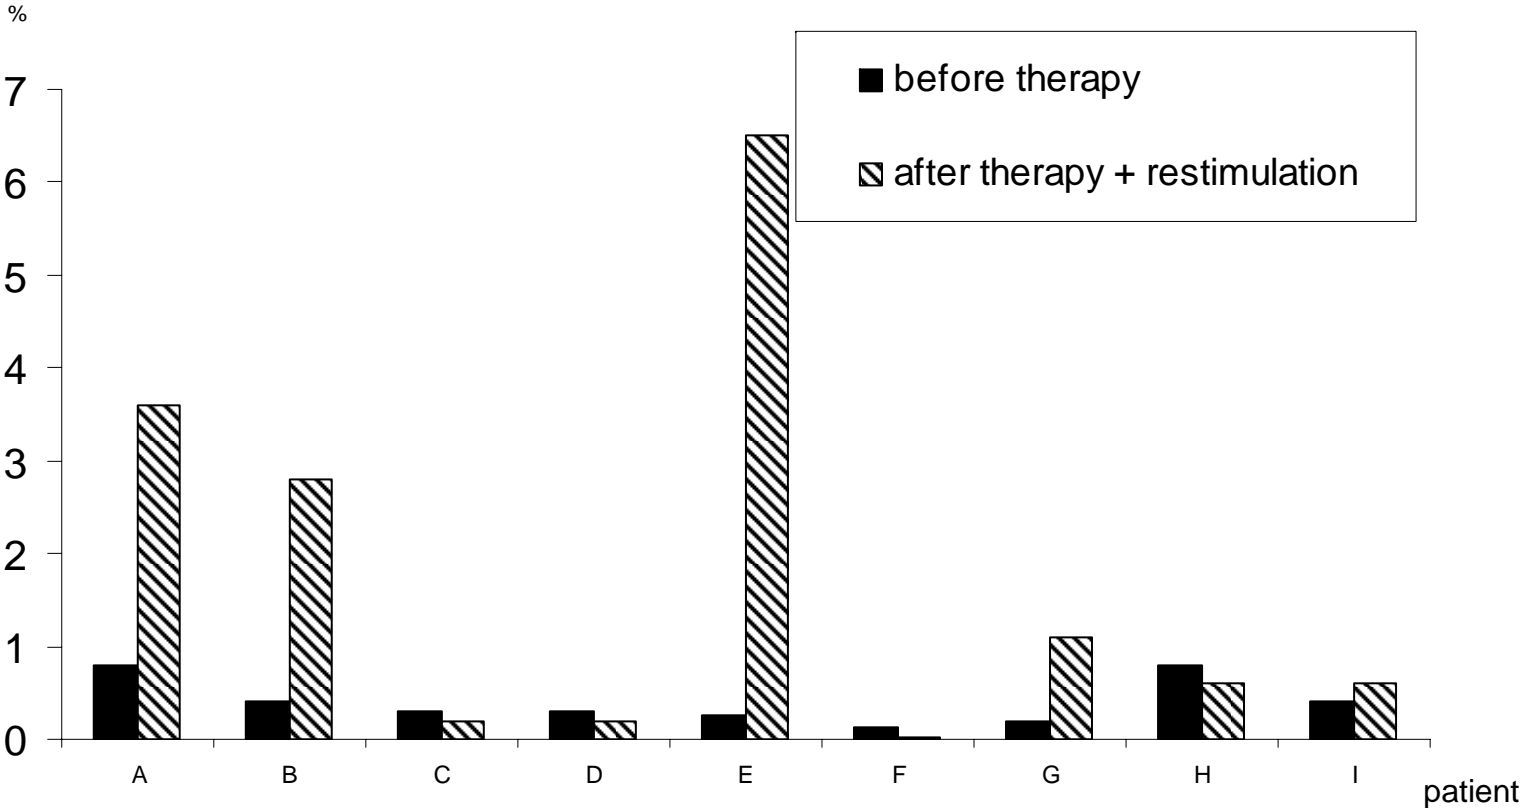

Supplement: MOESM4 [file 9661636]
